# Supplementary material for: Neuromechanical changes in Achilles tendinopathy and the effects of exercise-induced mechanical tendon loading: a protocol for a systematic review
Source: HighWire-hosted journal article supplement (doi:10.1136/bmjopen-2021-050186), 2022-02-01
Supplement: bmjopen-2021-050186supp002_data_supplement.pdf [file bmjopen-2021-050186supp002_data_supplement.pdf]

## Search strategy step 1 MEDLINE

### Search string

("Corticospinal excita\*" OR "cortical excita\*" OR "spinal excita\*" OR "spinal reflex" OR "H-reflex" OR "V-wave" OR "F-wave" OR "neural drive" OR "motor evoked potential\*" OR "evoked muscle response\*" OR "electromyogra\*" OR "activation" OR "co-activation" OR "preactivation" OR "electromechanic\*" OR "motor unit\*" OR "motor neuron\*" OR "length" OR "thickness" OR "cross sectional area" OR "modulus" OR "viscoelasticity" OR "elasticity" OR "strain" OR "stress" OR "stiffness" OR "volume" OR "creep" OR "mechanic\*" OR "morphologic\*") AND ("tendin\*" OR "tenosynovitis" OR "paratenonitis" OR "tendovaginitis" OR "peritendinitis" OR "achillodynia") AND ("Achilles" OR "TendoAchilles" OR "Tendo-Achilles" OR "calcaneal tendon" OR "gastrocnemius" OR "triceps surae" OR "calf muscle\*" OR "tibialis anterior")

### Keywords

- 1- Corticospinal excita\*.mp
- 2- Cortical excita\*.mp
- 3- Spinal excita\*.mp
- 4- Spinal reflex.mp
- 5- H-reflex.mp
- 6- V-wave.mp
- 7- F-wave.mp
- 8- Neural drive.mp
- 9- Motor evoked potential\*.mp
- 10- Evoked muscle response\*.mp
- 11- Electromyogra\*.mp
- 12- Activation.mp
- 13- Co-activation.mp
- 14- Preactivation.mp
- 15- Electromechanic\*.mp
- 16- Motor unit\*.mp
- 17- Motor neuron\*.mp
- 18- Length.mp
- 19- Thickness.mp
- 20- Cross sectional area.mp
- 21- Modulus.mp
- 22- Viscoelasticity.mp
- 23- Elasticity.mp
- 24- Strain.mp
- 25- Stress.mp
- 26- Stiffness.mp
- 27- Volume.mp

28- Creep.mp  
29- Mechanic\*.mp  
30- Morphologic\*.mp  
31- 1-30  
32- Tendin\*.mp  
33- Tenosynovitis.mp  
34- Paratenonitis.mp  
35- Tendovaginitis.mp  
36- Peritendinitis.mp  
37- Achillodynia.mp  
38- 32-37  
39- Achilles.mp  
40- TendoAchilles.mp  
41- Tendo-Achilles.mp  
42- Calcaneal tendon.mp  
43- Gastrocnemius.mp  
44- Triceps surae.mp  
45- Calf muscle\*.mp  
46- Tibialis anterior.mp  
47- 39-46  
48- 31 AND 38 AND 47

## Search strategy step 2 MEDLINE

### Search string

("corticospinal excita\*" OR "cortical excita\*" OR "spinal excita\*" OR "spinal reflex" OR "H-reflex" OR "V-wave" OR "F-wave" OR "neural drive" OR "motor evoked potential\*" OR "evoked muscle response\*" OR "electromyogra\*" OR "activation" OR "co-activation" OR "preactivation" OR "electromechanic\*" OR "motor unit\*" OR "motor neuron\*" OR "length" OR "thickness" OR "cross sectional area" OR "modulus" OR "viscoelasticity" OR "elasticity" OR "strain" OR "stress" OR "stiffness" OR "volume" OR "creep" OR "mechanic\*" OR "morphologic\*") AND ("mechanical load\*" OR "Exercise\*" OR "physical activity\*" OR "eccentric" OR "concentric" OR "isometric" OR "training" OR "strengthening" OR "stretching" OR "vibration" OR "oscillation" OR "plyometric" OR "running" OR "walking") AND ("tendin\*" OR "tenosynovitis" OR "paratenonitis" OR "tendovaginitis" OR "peritendinitis" OR "achillodynia") AND ("Achilles" OR "TendoAchilles" OR "Tendo-Achilles" OR "calcaneal tendon" OR "gastrocnemius" OR "triceps surae" OR "calf muscle\*" OR "tibialis anterior")

### Keywords

- 1- Corticospinal excita\*.mp
- 2- Cortical excita\*.mp
- 3- Spinal excita\*.mp
- 4- Spinal reflex.mp
- 5- H-reflex.mp
- 6- V-wave.mp
- 7- F-wave.mp
- 8- Neural drive.mp
- 9- Motor evoked potential\*.mp
- 10- Evoked muscle response\*.mp
- 11- Electromyogra\*.mp
- 12- Activation.mp
- 13- Co-activation.mp
- 14- Preactivation.mp
- 15- Electromechanic\*.mp
- 16- Motor unit\*.mp
- 17- Motor neuron\*.mp
- 18- Length.mp
- 19- Thickness.mp
- 20- Cross sectional area.mp
- 21- Modulus.mp
- 22- Viscoelasticity.mp
- 23- Elasticity.mp
- 24- Strain.mp

25- Stress.mp  
26- Stiffness.mp  
27- Volume.mp  
28- Creep.mp  
29- Mechanic\*.mp  
30- Morphologic\*.mp  
~~31- 1-30~~  
32- Mechanical load\*.mp  
33- Exercise\*.mp  
34- Physical activity\*.mp  
35- Eccentric.mp  
36- Concentric.mp  
37- Isometric.mp  
38- Training.mp  
39- Strengthening.mp  
40- Stretching.mp  
41- Vibration.mp  
42- Oscillation.mp  
43- Plyometric.mp  
44- Running.mp  
45- Walking.mp  
~~46- 32-45~~  
47- Tendin\*.mp  
48- Tenosynovitis.mp  
49- Paratenonitis.mp  
50- Tendovaginitis.mp  
51- Peritendinitis.mp  
52- Achillodynia.mp  
~~53- 47-52~~  
54- Achilles.mp  
55- TendoAchilles.mp  
56- Tendo-Achilles.mp  
57- Calcaneal tendon.mp  
58- Gastrocnemius.mp  
59- Triceps surae.mp  
60- Calf muscle\*.mp  
61- Tibialis anterior.mp  
~~62- 54-61~~  
~~63- 31 AND 46 AND 53 AND 62~~
